# Supplementary material for: Picroside II Isolated from Pseudolysimachion rotundum var. subintegrum Inhibits Glucocorticoid Refractory Serum Amyloid A (SAA) Expression and SAA-induced IL-33 Secretion
Source: MDPI journal article supplement (doi:10.3390/molecules24102020), 2019-05-27
Supplement: s1 [file s1]

# Picroside II inhibits glucocorticoid refractory Serum Amyloid A (SAA) expression and SAA-induced IL-33 secretion

\*Corresponding author (Hyun-Jun Lee)

Tel: +82-43-240-6115

Fax: +82-43-240-3464

Email: [hjlee7@kribb.re.kr](mailto:hjlee7@kribb.re.kr)

## Supplementary figure files

Supplementary Fig. S1. The inhibitory effect of picroside II on LPS-induced SAA expression in THP-1 cells.

Supplementary Fig. S2. Effects of picroside II on SAA-stimulated NCI-H292 cells viability.

Supplementary Fig. S3. Effect of PIC II on the SAA-induced IL33 mRNA expression in NCI-H292 cells.

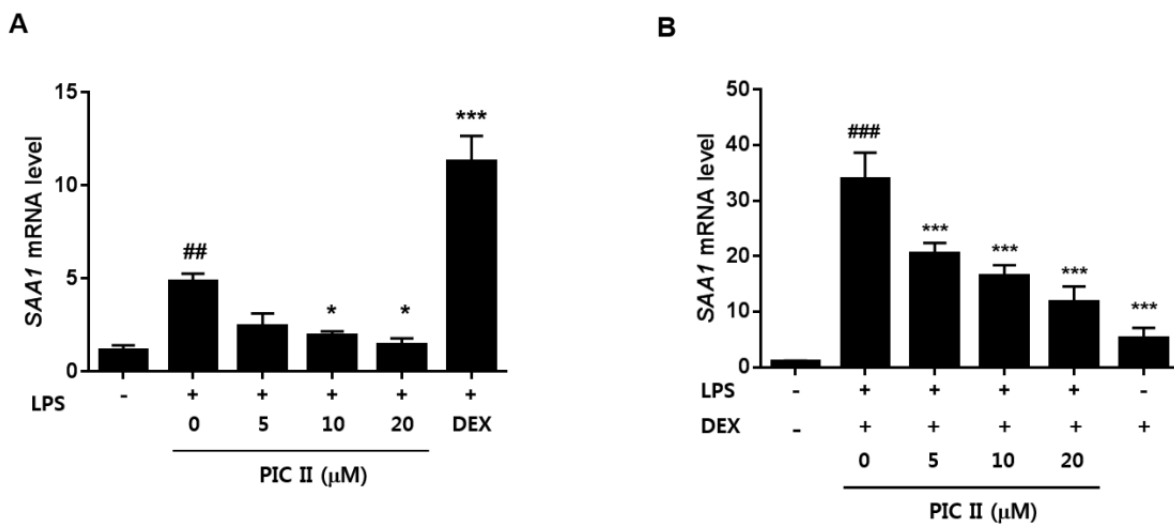

**Supplementary Fig. S1. The inhibitory effect of picoside II on LPS-induced SAA expression in THP-1 cells.**

THP-1 cells were pretreated with indicated concentrations of PIC II or DEX (1  $\mu$ M) for 1h and then stimulated with LPS (0.2  $\mu$ g/ml) or LPS (0.2  $\mu$ g/ml) plus DEX (1  $\mu$ M) for 6h. The mRNA expression of SAA1 was measured by real-time RT-PCR levels of SAA1 gene expression were normalized to  $\beta$ -actin. ##p<0.01 and ###p<0.001, compared with medium alone;\*p<0.05, and \*\*\*p<0.001, compared with LPS alone.

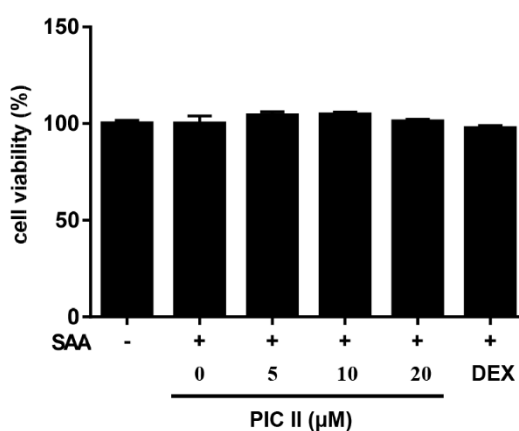

**Supplementary Fig. S2. Effects of picoside II on SAA-stimulated NCI-H292 cells viability.** Cells were pretreated with PIC II (5, 10, 20  $\mu$ M) or DEX (1  $\mu$ M) for 1h and stimulated with SAA (0.2  $\mu$ g/ml) for 24h. Cell viability was measured by means of a 3-(4,5-dimethylthiazol-2-yl)-2,5-diphenyltetrazolium bromide (MTT; Amresco, Solon, OH) assay.

**A**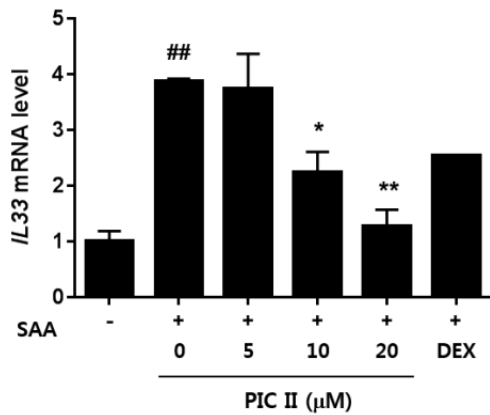**B**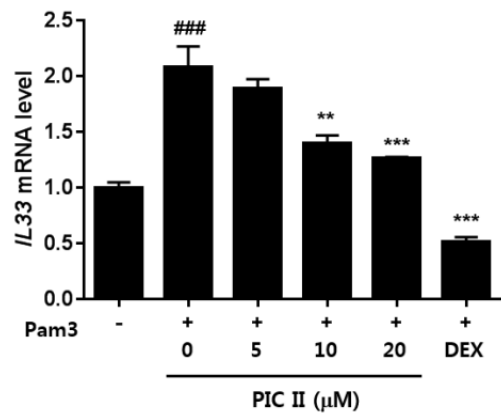

**Supplementary Fig. S3. Effect of PIC II on the SAA-induced *IL33* mRNA expression in NCI-H292 cells.**

NCI-H292 cells were pretreated with indicated concentrations of PIC II or DEX (1 μM) for 1h and subsequently treated with (A) SAA (0.5 μg/ml) or (B) pam3 (0.2 μg/ml) for 6h. The mRNA expression of *IL33* was measured by real-time RT-PCR and levels of *IL33* gene expression were normalized to β-actin. ##p<0.01 and ###p<0.001, compared with medium alone; \*p<0.01, \*\*p<0.01 and \*\*\*p<0.001, compared with SAA or Pam3 alone.
